# Supplementary material for: Controllable synthesis of mesostructures from TiO2hollow to porous nanospheres with superior rate performance for lithium ion batteries
Source: Royal Society of Chemistry journal article supplement (doi:10.1039/c5sc03203b), 2015-10-26
Supplement: c5sc03203b1.pdf [file c5sc03203b1.pdf]

# Controllable Synthesis of Mesostructures – from TiO<sub>2</sub> Hollow to Porous Nanospheres with Superior Rate Performance for Lithium Ion Batteries

Hao Ren,<sup>a</sup> Jiajia Sun,<sup>a</sup> Ranbo Yu,<sup>a,\*</sup> Mei Yang,<sup>b</sup> Lin Gu,<sup>c</sup> Porun Liu,<sup>d</sup> Huijun Zhao,<sup>d</sup> David Kisailus,<sup>e</sup> and Dan Wang<sup>b,d</sup>

<sup>a</sup> Department of Physical Chemistry, School of Metallurgical and Ecological Engineering, University of Science & Technology Beijing

No. 30, Xueyuan Road, Haidian District, Beijing 100083, P. R. China.

<sup>b</sup> National Key Laboratory of Biochemical Engineering, Institute of Process Engineering, Chinese Academy of Sciences

No. 1, Bei Er Tiao, Zhongguancun, Beijing 100190, P. R. China.

<sup>c</sup> Laboratory for Advanced Materials & electron Microscopy, Beijing National Laboratory for Condensed Matter Physics, Institute of Physics, Chinese Academy of Sciences, Beijing 100190, P. R. China.

<sup>d</sup> Centre for Clean Environment and Energy, Gold Coast Campus, Griffith University, Southport, Queensland 4222, Australia.

<sup>e</sup> Department of Chemical and Environmental Engineering, University of California, Riverside, CA 92521.

## Supporting Information

### Experimental Section

*Materials:* All reagents purchased from Beijing Chemical Reagent Factory were of analytical grade and used without further purification.

*Synthesis of quasi-nano-sized carbonaceous spheres:* The carbonaceous spheres were

prepared by a hydrothermal method. Typically, 89 g of glucose was dissolved in 250 mL of deionized water to form a uniform solution and sealed into a 500 mL Teflon reactor. The reactor was then put into an oven for 5.5 h at 180 °C and cooled to room temperature. The brown product was centrifuged at 9000 rpm for 8 min and washed 3 times with deionized water and ethanol followed by drying at 80 °C overnight. These quasi-nano-sized carbonaceous spheres (CNS) were used as templates.

*Synthesis of hollow TiO<sub>2</sub> nanospheres (TiO<sub>2</sub>-HNS) and mesoporous TiO<sub>2</sub> nanospheres (TiO<sub>2</sub>-PNS):* To synthesize TiO<sub>2</sub>, a 3 M TiCl<sub>4</sub> aqueous precursor solution was made by slowly adding 17 mL of pure TiCl<sub>4</sub> into a mixture of ice and deionized water to form a 50 mL solution. 1 g of the as-prepared quasi-nano-sized carbonaceous spheres were added into the TiCl<sub>4</sub> aqueous solution and ultrasonicated for 15 min to disperse the CNS followed by aging for 6 h (12 h for mesoporous nanospheres) under stirring. The products were centrifuged at 9000 rpm for 8 min and washed once with acetic acid and dried at 80 °C overnight. The products were subsequently calcined at 10 °C min<sup>-1</sup> (1 °C min<sup>-1</sup> for porous nanospheres) to 400 °C for 4 h resulting in white TiO<sub>2</sub>-HNS and TiO<sub>2</sub>-PNS products. For TiO<sub>2</sub>-HNS-500 and TiO<sub>2</sub>-PNS-500, the calcination temperature was 500 °C. For TiO<sub>2</sub>-HNS-600 and TiO<sub>2</sub>-PNS-600, the calcination temperature was 600 °C.

TiO<sub>2</sub> core-shell nanospheres were formed when the 12 h adsorbed CNS was calcined at a heating rate of 10 °C min<sup>-1</sup> to 400 °C for 4 h while porous nanospheres with loose aggregated nanoparticles (TiO<sub>2</sub>-PNS-LS) were formed when the 6 h adsorbed CNS was calcined at a heating rate of 1 °C min<sup>-1</sup> to 400 °C for 4 h.

The detailed synthesis conditions of different types of TiO<sub>2</sub> nanospheres have been summarized in **Table S1**.

*Materials characterization:* Scanning electron microscopy (SEM) images were obtained using a JSM-6700 microscope operated at 5.0 kV. Transmission electron microscope (TEM) images were taken using a FEI Tecnai F20 instrument operated at an accelerating voltage of 200 kV. Thermogravimetric (TG) analyses were performed on a TGA Q500 thermogravimetric analyzer in air with a heating rate of 10°C min<sup>-1</sup>. Powder X-ray diffraction (XRD) patterns were recorded on a Panalytical X'Pert PRO MPD [Cu K $\alpha$  radiation ( $\lambda$  = 1.5405 Å)], operating at 40 kV and 30 mA. Raman spectra were measured with a HORIBA Raman system model LabRAM HR Evolution spectrometer. The 532 nm line of argon ion laser was used as the excitation source and the resolution of the Raman instrument is ca. 0.65 cm<sup>-1</sup>. The Raman band of the silicon wafer at 520.7 cm<sup>-1</sup> was used to calibrate the spectrometer. The nitrogen adsorption-desorption isotherms were measured at -196°C using a Quantachrome Autosorb-1MP sorption analyzer. Samples were degassed under vacuum at 200°C overnight prior to analysis.

*Electrochemical measurements:* Electrochemical measurements of the prepared TiO<sub>2</sub> hollow and porous nanosphere samples were carried out using CR2032 coin type cells with lithium metal as the counter and reference electrodes at room temperature. The electrolyte was 1 M LiPF<sub>6</sub> in a 50:50 w/w mixture of ethylene carbonate and diethyl carbonate. The working electrode was fabricated by compressing a mixture of the active materials, conductive material (carbon black), and binder (polyvinylidene

fluoride) in a weight ratio of  $\text{TiO}_2/\text{carbon}/\text{PVDF} = 7:2:1$  onto a copper foil current collector. The typical mass loading of active materials for each coin cell was approximately 2 mg. The cells were assembled in an argon-filled glove box with the concentrations of moisture and oxygen below 0.1 ppm. The electrode capacity was measured by a galvanostatic discharge-charge method between 1.0 V and 3.0 V at 1 C, 2 C, 5 C and 10 C and 20 C with a Neware BST-5 V 5 mA battery test system. Samples were examined using cyclic voltammetry from 1.0-3.0 V (vs.  $\text{Li}^+/\text{Li}$ ) at a constant scan rate of  $1 \text{ mV s}^{-1}$ . Electrochemical impedance spectra (EIS) tests were carried out over a frequency range of 0.1 to  $10^5$  Hz with an AC amplified voltage of 5 mV.

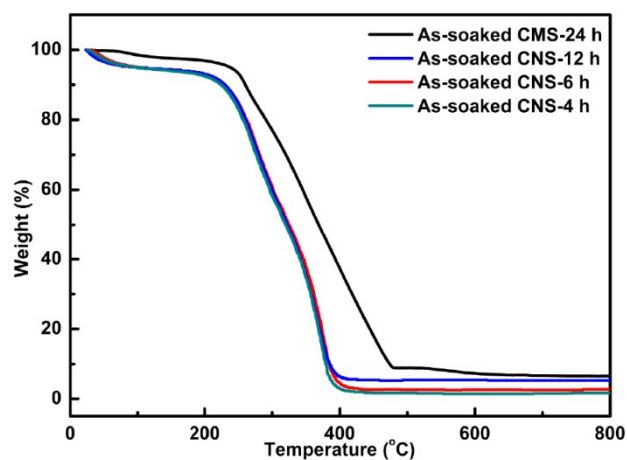

**Figure S1.** Thermogravimetric heating curves of the as-adsorbed carbonaceous microspheres (CMS) for 24 h and as-adsorbed quasi-nano-sized carbonaceous nanospheres (CNS) for 4h, 6h and 12 h in a 3 M  $\text{TiCl}_4$  aqueous solution.

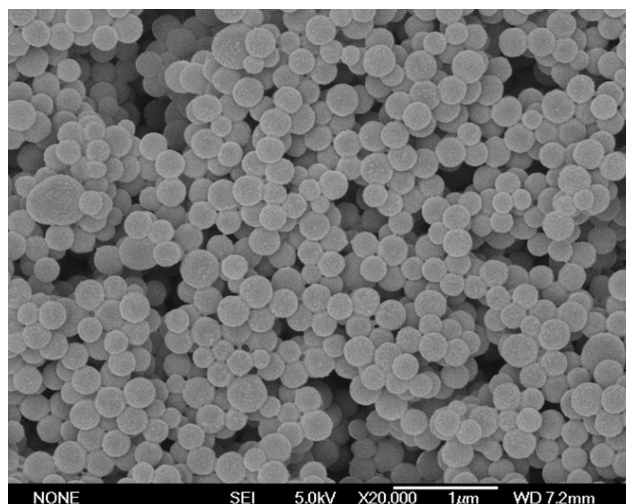

**Figure S2.** SEM micrograph of as-prepared CNS.

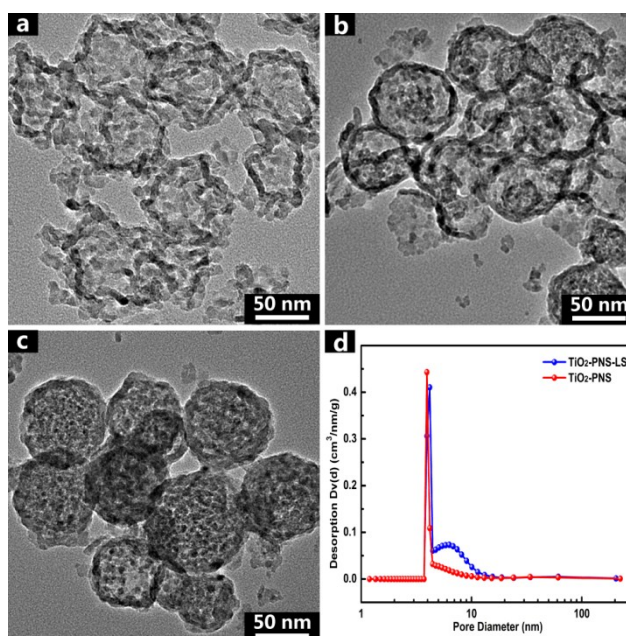

**Figure S3.** TEM micrographs of samples calcined at 400 °C for 4h (a) at a heating rate of 10 °C min<sup>-1</sup> after adsorbing a 3 M TiCl<sub>4</sub> aqueous solution for 4 h (collapsed TiO<sub>2</sub>-HNS); (b) at a heating rate of 10 °C min<sup>-1</sup> after adsorbing a 3 M TiCl<sub>4</sub> aqueous solution for 12 h (TiO<sub>2</sub>-core-shell nanospheres); (c) at a heating rate of 1 °C min<sup>-1</sup> after adsorbing a 3 M TiCl<sub>4</sub> aqueous solution for 6 h (TiO<sub>2</sub>-PNS-LS); (d) Barret-Joyner-Halenda (BJH) pore-size distribution curves of TiO<sub>2</sub>-PNS and TiO<sub>2</sub>-PNS-LS.

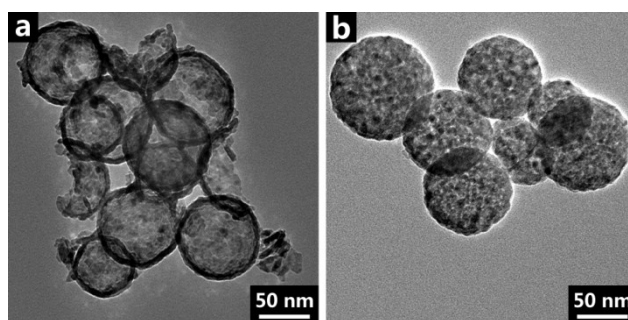

**Figure S4.** TEM micrographs of (a)  $\text{TiO}_2\text{-HNS-500}$  which were calcined at  $500\text{ }^\circ\text{C}$  for 4 h at a heating rate of  $10\text{ }^\circ\text{C min}^{-1}$  after absorbing 3 M  $\text{TiCl}_4$  aqueous solution for 6 h and (b)  $\text{TiO}_2\text{-PNS-500}$  which were calcined at  $500\text{ }^\circ\text{C}$  for 4 h at a heating rate of  $1\text{ }^\circ\text{C min}^{-1}$  after absorbing 3 M  $\text{TiCl}_4$  aqueous solution for 12 h.

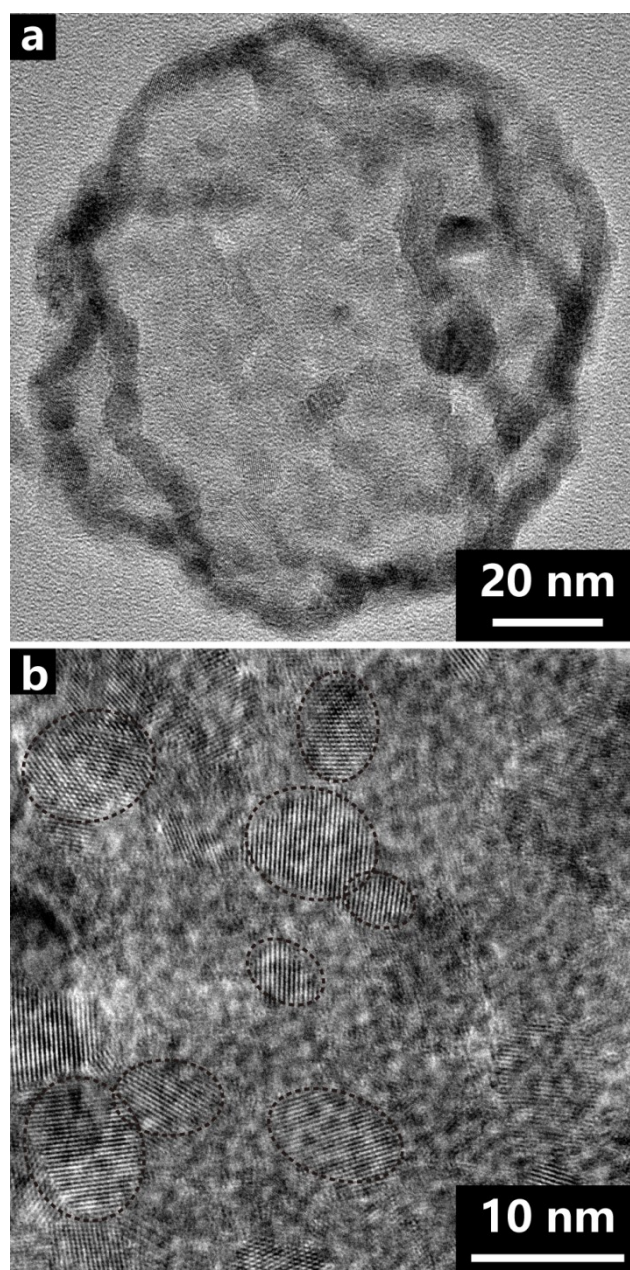

**Figure S5.** TEM images of  $\text{TiO}_2$ -HNS highlighting nanoparticles within the shell.

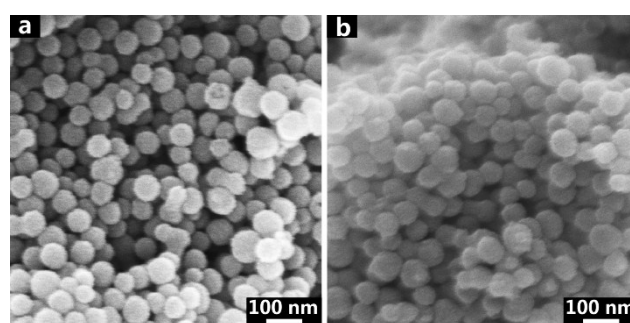

**Figure S6.** SEM micrographs of (a)  $\text{TiO}_2$ -HNS and (b)  $\text{TiO}_2$ -PNS.



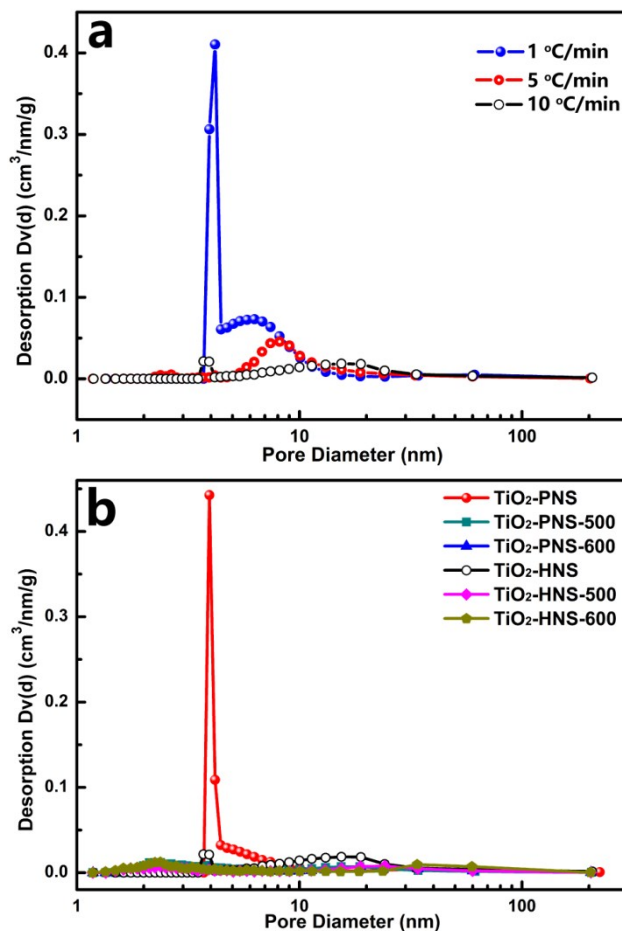

**Figure S7.** (a) Pore size distribution of  $\text{TiO}_2$  nanospheres obtained by calcination at 400 °C for 4 h with a heating rate of 1, 5 and 10 °C/min after adsorbing a 3 M  $\text{TiCl}_4$  aqueous solution for 6 h; (b) Pore size distribution of  $\text{TiO}_2$  porous nanospheres calcinated under 400, 500 and 600 °C for 4 h at a heating rate of 1 °C/min after adsorbing a 3 M  $\text{TiCl}_4$  aqueous solution for 12 h ( $\text{TiO}_2$ -PNS,  $\text{TiO}_2$ -PNS-500 and  $\text{TiO}_2$ -PNS-600), and  $\text{TiO}_2$  hollow nanospheres calcinated under 400, 500 and 600 °C for 4 h at a heating rate of 10 °C/min after adsorbing a 3 M  $\text{TiCl}_4$  aqueous solution for 6 h ( $\text{TiO}_2$ -HNS,  $\text{TiO}_2$ -HNS-500 and  $\text{TiO}_2$ -HNS-600).



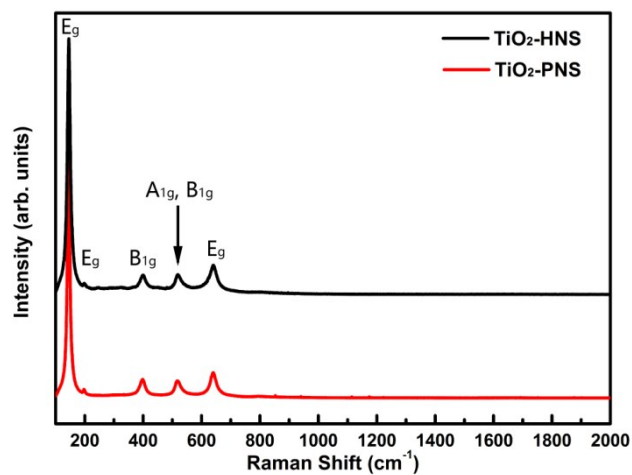

**Figure S8.** Raman spectra of TiO<sub>2</sub>-HNS and TiO<sub>2</sub>-PNS.

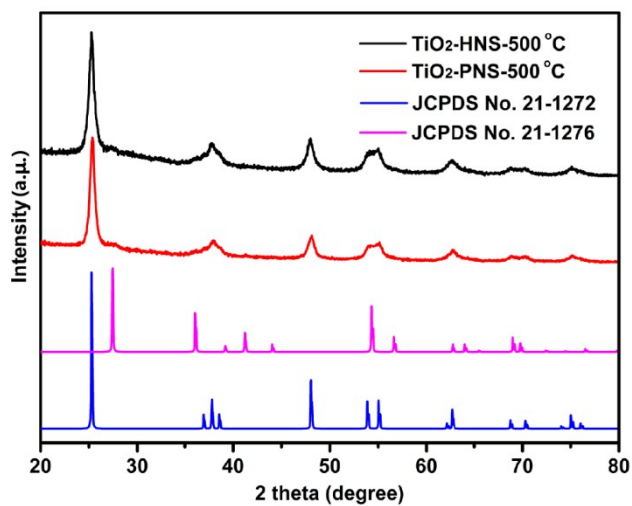

**Figure S9.** XRD patterns of TiO<sub>2</sub>-HNS-500 and TiO<sub>2</sub>-PNS-500.

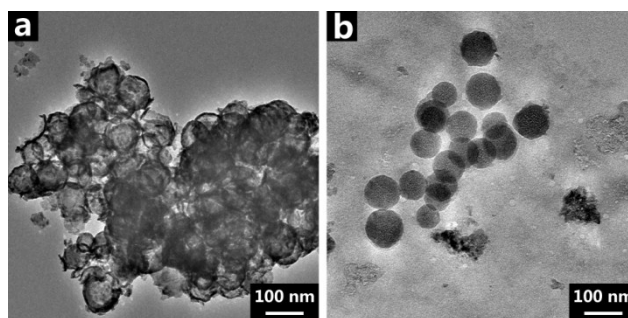

**Figure S10.** TEM micrographs of (a) TiO<sub>2</sub>-HNS and (b) TiO<sub>2</sub>-PNS after 100 cycles at a current rate of 1 C.

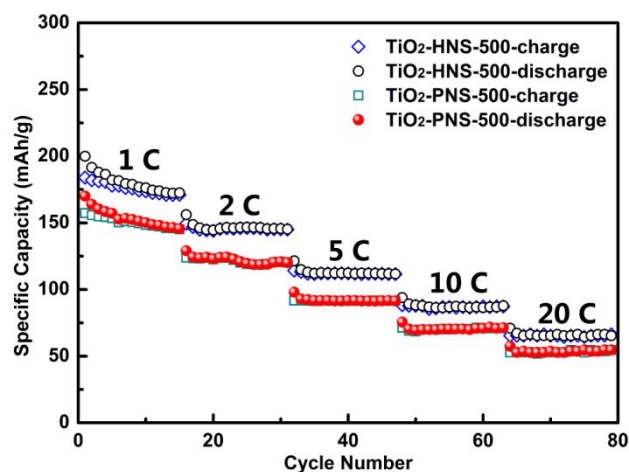

**Figure S11.** Cycling performance of TiO<sub>2</sub>-HNS-500 and TiO<sub>2</sub>-PNS-500 at various charge-discharge current rates from 1 C to 20 C between 1.0 and 3.0 V.

**Table S1.** Synthesis conditions of the as-prepared TiO<sub>2</sub> nanospheres.

| Sample                       | Adsorbing Time | Calcination Heating Rate | Calcination Temperature | Label Corresponding to Figure 1 |
|------------------------------|----------------|--------------------------|-------------------------|---------------------------------|
| TiO <sub>2</sub> -HNS        | 6 h            | 10 °C/min                | 400 °C for 4 h          | (a)                             |
| TiO <sub>2</sub> -core-shell | 12 h           | 10 °C/min                | 400 °C for 4 h          | (b)                             |
| TiO <sub>2</sub> -PNS        | 12 h           | 1 °C/min                 | 400 °C for 4 h          | (c)                             |
| TiO <sub>2</sub> -PNS-LS     | 6 h            | 1 °C/min                 | 400 °C for 4 h          | (d)                             |
| TiO <sub>2</sub> -HNS-500    | 6 h            | 10 °C/min                | 500 °C for 4 h          | (e)                             |
| TiO <sub>2</sub> -PNS-500    | 12 h           | 1 °C/min                 | 500 °C for 4 h          | (f)                             |

**Table S2.** Summary of parameters from nitrogen adsorption-desorption isotherms of the as-prepared TiO<sub>2</sub> nanospheres.

| Sample                       | Specific Surface Area (m <sup>2</sup> /g) | Main Pore Size (nm) | Pore Volume (cm <sup>3</sup> /g) |
|------------------------------|-------------------------------------------|---------------------|----------------------------------|
| TiO <sub>2</sub> -HNS        | 65.8                                      | 4 / 20              | 0.86                             |
| TiO <sub>2</sub> -core-shell | 65.6                                      | 4 / 20              | 0.82                             |
| TiO <sub>2</sub> -PNS        | 51.3                                      | 4                   | 0.57                             |

**Table S3.** Summary of discharge capacities of the as-prepared TiO<sub>2</sub>-HNS, TiO<sub>2</sub>-PNS, TiO<sub>2</sub>-HNS-500 and TiO<sub>2</sub>-PNS-500 at various current rates between 1.0 and 3.0 V. (Each discharge capacity summarized here is the last cycle of each current rate.)

| Samples                       | 1 C     | 2 C     | 5 C     | 10 C    | 20 C    |
|-------------------------------|---------|---------|---------|---------|---------|
|                               | (mAh/g) | (mAh/g) | (mAh/g) | (mAh/g) | (mAh/g) |
| TiO <sub>2</sub> -HNS         | 211.7   | 190.3   | 161.8   | 144.1   | 125.9   |
| TiO <sub>2</sub> -PNS         | 194.8   | 175.3   | 149.7   | 131.1   | 113.4   |
| TiO <sub>2</sub> -HNS-<br>500 | 172.5   | 145.3   | 111.7   | 87.8    | 65.4    |
| TiO <sub>2</sub> -PNS-500     | 145.7   | 120.2   | 91.5    | 71.4    | 54.7    |
